# Supplementary material for: Limonene-in-water Pickering emulsion and on-demand separation using thermo-responsive biodegradable nanoparticles
Source: Royal Society of Chemistry journal article supplement (doi:10.1039/d1nr00694k), 2021-01-01
Supplement: d1nr00694k1.pdf [file d1nr00694k1.pdf]

Supporting Information for

# Limonene-in-Water Pickering Emulsion and On-Demand Separation Using Thermo-Responsive Biodegradable Nanoparticles

Nicolò Manfredini<sup>1</sup>, Manuel Merigo<sup>1</sup>, Juri Ilare<sup>1</sup>, Mattia Sponchioni<sup>1,\*</sup> and Davide Moscatelli<sup>1</sup>

<sup>1</sup>Department of Chemistry, Materials and Chemical Engineering “Giulio Natta”, Politecnico di Milano, Via Mancinelli 7 - 20131 Milano, Italy.

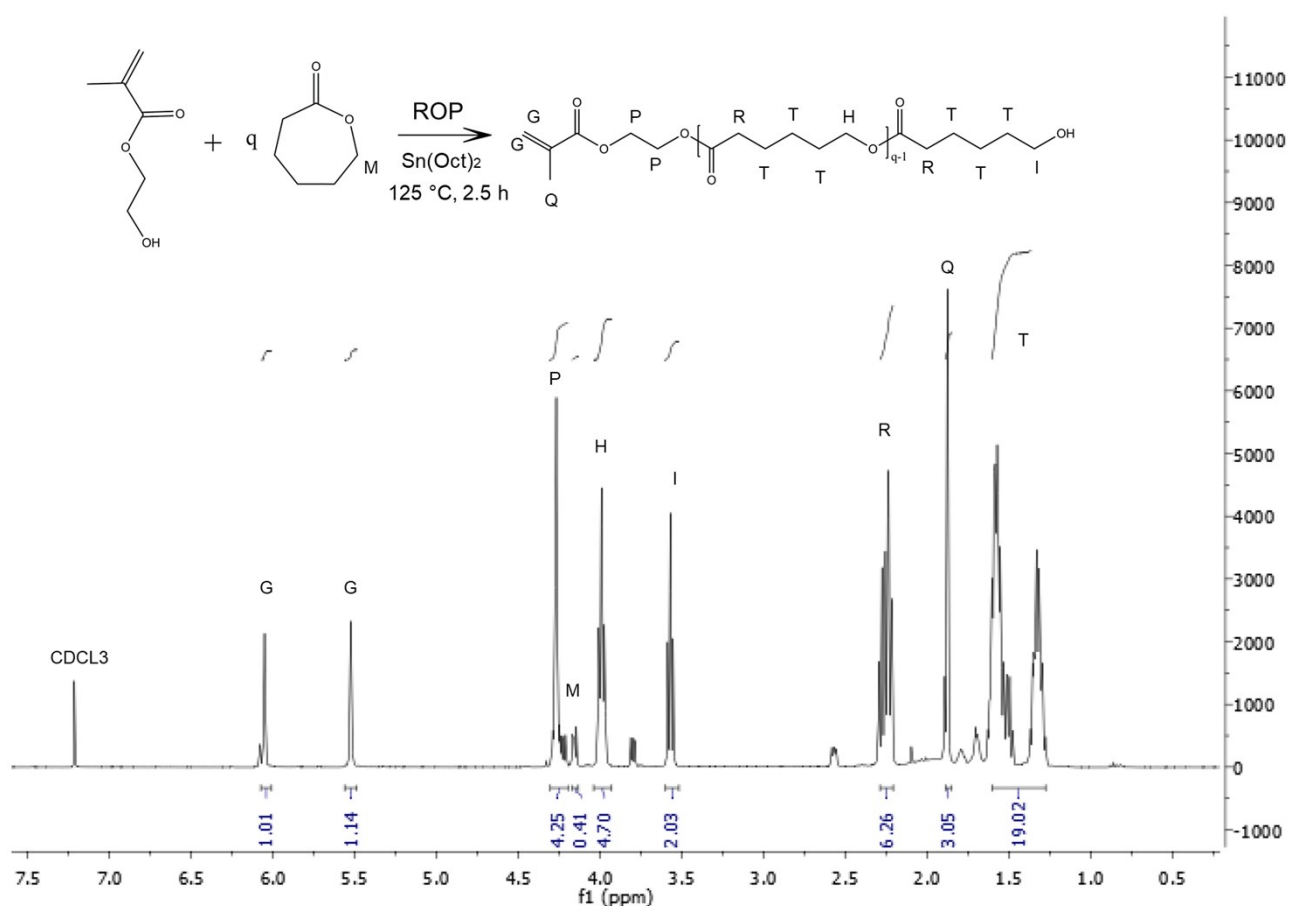

**Figure S1:** <sup>1</sup>H-NMR characterization and proton assignment for HEMACL3 ( $q=3$ ). The analysis was performed on a Bruker Ultrashield 400 MHz spectrometer using deuterated chloroform ( $\text{CDCl}_3$ ) as solvent.

The monomer conversion ( $X_{CL}$ ) was calculated according to eq. S1:

$$X_{CL} = \left( \frac{H + I}{H + I + M} \right) * 100 \quad (\text{S1})$$

Where M represents the area under the signal of the two hydrogens adjacent to the ester group in the CL monomer, H indicates the peaks equivalent to the two hydrogen atoms adjacent to the ester group and I corresponds to hydrogens of the carbon near the chain-end hydroxyl group.

The degree of polymerization (q) was obtained using the area of the same signals according to **eq. S2**:

$$q = \frac{H}{I} + 1 \quad (\text{S2})$$

**Table S1:** *Properties of the oligoesters synthesized. The  $\epsilon$ -caprolactone conversion ( $X_{CL}$ ) and average macromonomer chain length ( $q$ ) were determined via NMR according to eqs. S1 and S2. The number-average molecular weight ( $M_n$ ) and dispersity ( $\mathcal{D}$ ) were obtained via GPC.*

| <b>Sample</b> | $X_{CL}$<br>[%] | $q$<br>[-] | <b><math>M_n</math></b><br>[Da] | <b><math>\mathcal{D}</math></b><br>[-] |
|---------------|-----------------|------------|---------------------------------|----------------------------------------|
| HEMACL3       | 94.25           | 3.31       | 577                             | 1.25                                   |
| HEMACL5       | 98.91           | 5.24       | 858                             | 1.22                                   |

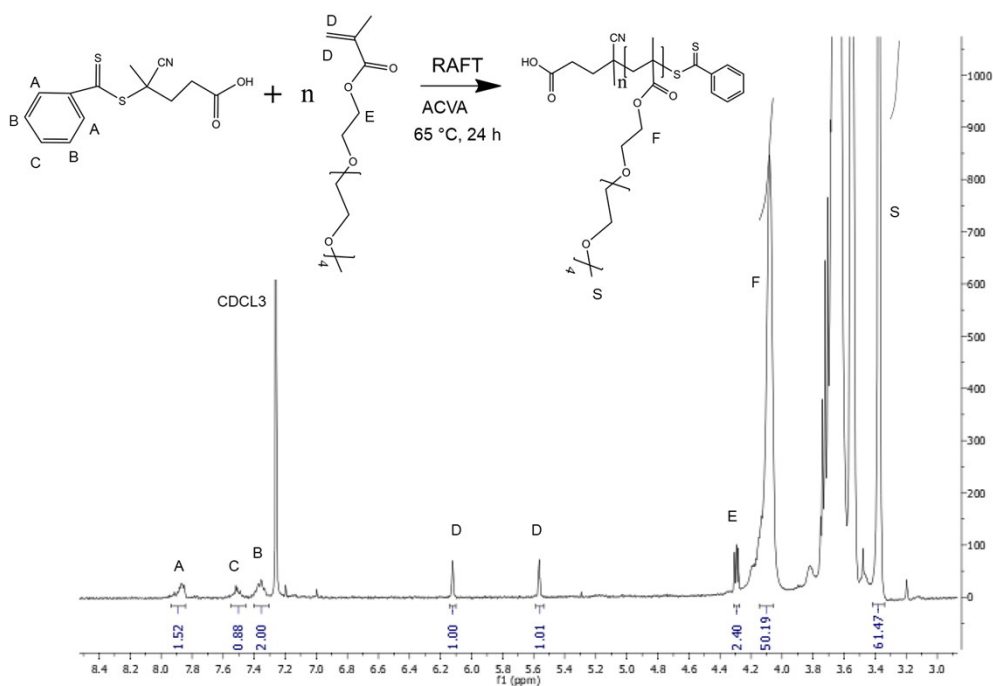

**Figure S2:**  $^1\text{H-NMR}$  characterization and proton assignment for  $20\text{EG}_4$  ( $n=20$ ). The analysis was performed on a Bruker Ultrashield 400 MHz spectrometer using deuterated chloroform ( $\text{CDCl}_3$ ) as solvent.

The monomer conversion ( $X_{EG_4}$ ) was calculated according to **eq. S3**:

$$X_{EG_4} = \left( \frac{F}{E + F} \right) * 100 \quad (\text{S3})$$

Where E and F are the area of the peaks attributed to the two hydrogens close to the oxygen in the unreacted monomer and polymer, respectively.

The degree of polymerization ( $n$ ) was calculated with **eq. S4**:

$$n = \frac{F}{B} \quad (\text{S4})$$

Where B is associated to the two hydrogens of the aromatic ring in the chain transfer agent.

**Table S2:** Properties of the macro CTAs synthesized. The monomer conversion ( $X_{EG_4}$ ) and average chain length ( $n$ ) were determined via NMR according to eqs. S3 and S4. The number-average molecular weight ( $M_n$ ) and dispersity ( $\mathcal{D}$ ) were obtained via GPC.

| Sample            | $X_{EG_4}$<br>[%] | $n$<br>[-] | $M_n$<br>[Da] | $\mathcal{D}$<br>[-] |
|-------------------|-------------------|------------|---------------|----------------------|
| 20EG <sub>4</sub> | 95.43             | 25.09      | 8456          | 1.12                 |
| 40EG <sub>4</sub> | 96.23             | 43.41      | 12013         | 1.07                 |

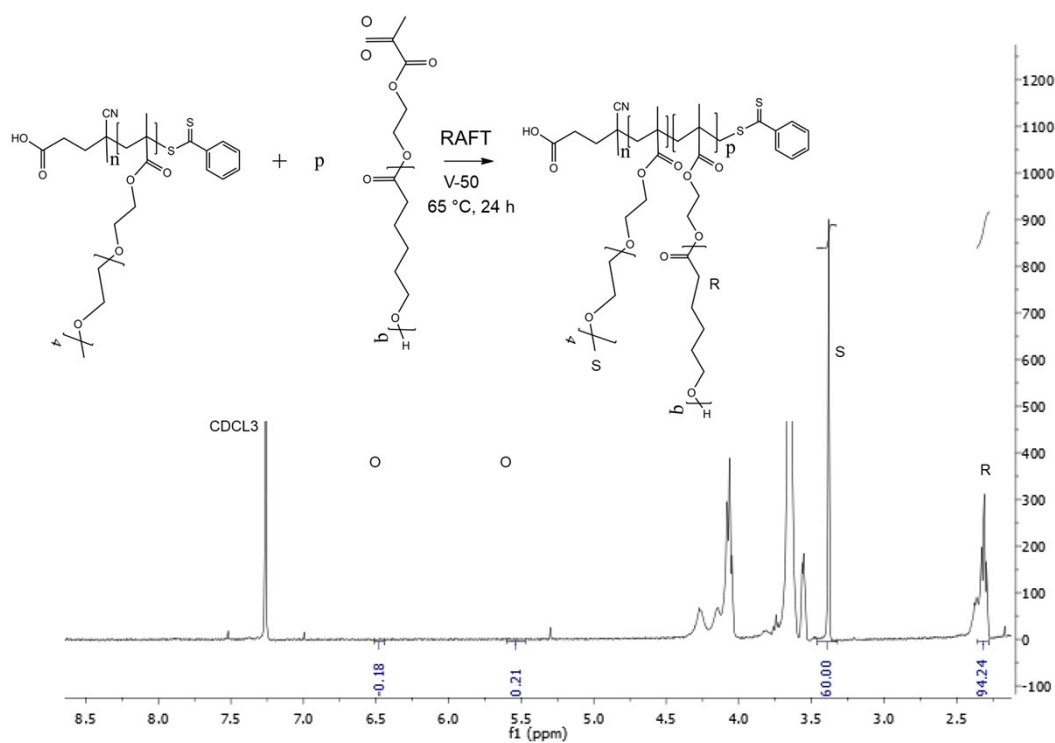

**Figure S3:**  $^1\text{H-NMR}$  characterization and proton assignment for 20EG<sub>4</sub>-15CL3 ( $p=15$ ). The analysis was performed on a Bruker Ultrashield 400 MHz spectrometer using deuterated chloroform ( $\text{CDCl}_3$ ) as solvent.

The monomer conversion ( $X$ ) according to eq. S5:

$$X = \left(1 - \frac{2qO}{R}\right) * 100 \quad (\text{S5})$$

R is the area of the peak attributed to the two vinyl hydrogens in the unreacted monomer, O is the area of the peak associated to the hydrogens near the carbonyl group either in the monomer or in the polymer and  $q$  the average chain length of the macromonomer.

The degree of polymerization ( $p$ ) was calculated according to **eq. S6**:

$$p = \frac{\frac{R}{2q}}{\frac{S}{3n}} = \frac{3nR}{2qS} \quad (\text{S6})$$

Where R and S are the areas of the corresponding peaks shown in **Figure S3**, while  $q$  and  $n$  are the average chain lengths of the macromonomer and the macro CTA adopted using the synthesis and reported in **Table S1** and **Table S2**, respectively.

**Table S3:** *Properties of the synthesized NPs in terms of monomer conversion ( $X$ ) and average degree of polymerization ( $p$ ) determined from  $^1\text{H}$  NMR and number-average molecular weight ( $M_n$ ) and dispersity ( $\mathcal{D}$ ) measured via GPC.*

| Sample                      | $X$<br>[%] | $p$<br>[-] | $M_n$<br>[Da] | $\mathcal{D}$<br>[-] |
|-----------------------------|------------|------------|---------------|----------------------|
| 20EG <sub>4</sub> -15CL3    | 98.90      | 15.42      | 23145         | 1.11                 |
| 20EG <sub>4</sub> -25CL3    | 98.65      | 23.27      | 26432         | 1.11                 |
| 20EG <sub>4</sub> -50CL3    | 98.90      | 52.59      | 42145         | 1.21                 |
| 40EG <sub>4</sub> -15CL3    | 98.21      | 17.30      | 28121         | 1.11                 |
| 40EG <sub>4</sub> -25CL3    | 99.62      | 24.80      | 29573         | 1.17                 |
| 40EG <sub>4</sub> -50CL3    | 99.16      | 53.32      | 52890         | 1.21                 |
| 20EG <sub>4</sub> -25CL5    | 98.72      | 25.17      | 32113         | 1.26                 |
| 40EG <sub>4</sub> -15CL5    | 99.52      | 13.51      | 31065         | 1.19                 |
| 40EG <sub>4</sub> -25CL5    | 99.26      | 27.43      | 43125         | 1.21                 |
| 40EG <sub>4</sub> -50CL5    | 97.94      | 48.15      | 56859         | 1.12                 |
| 20EG <sub>4</sub> -25CL3_Rh | 99.33      | 26.78      | 28819         | 1.32                 |

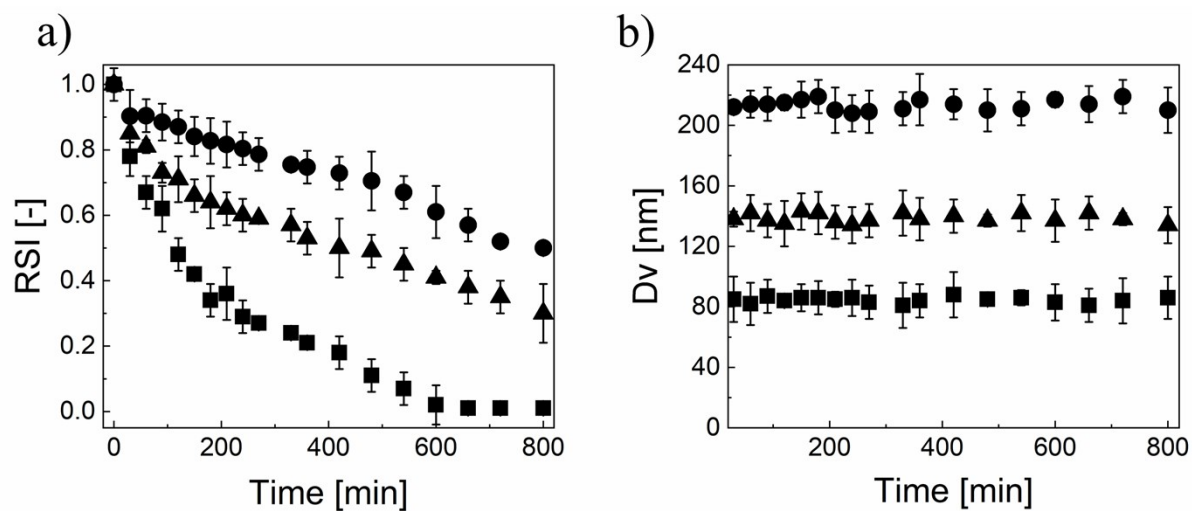

**Figure S4:** (a) Relative scattering intensity (RSI) as a function of time in the case of 40EG<sub>4</sub>-15CL5 (■) 40EG<sub>4</sub>-25CL5 (▲) and 40EG<sub>4</sub>-50CL5 (●), when the samples are diluted to 0.5% w/w in a solution of NaOH 0.1 M. (b) NP size as function of time in the case of 40EG<sub>4</sub>-15CL5 (■) 40EG<sub>4</sub>-25CL5 (▲) and 40EG<sub>4</sub>-50CL5 (●), when the samples are diluted to 0.5% w/w in a solution of NaOH 0.1 M.

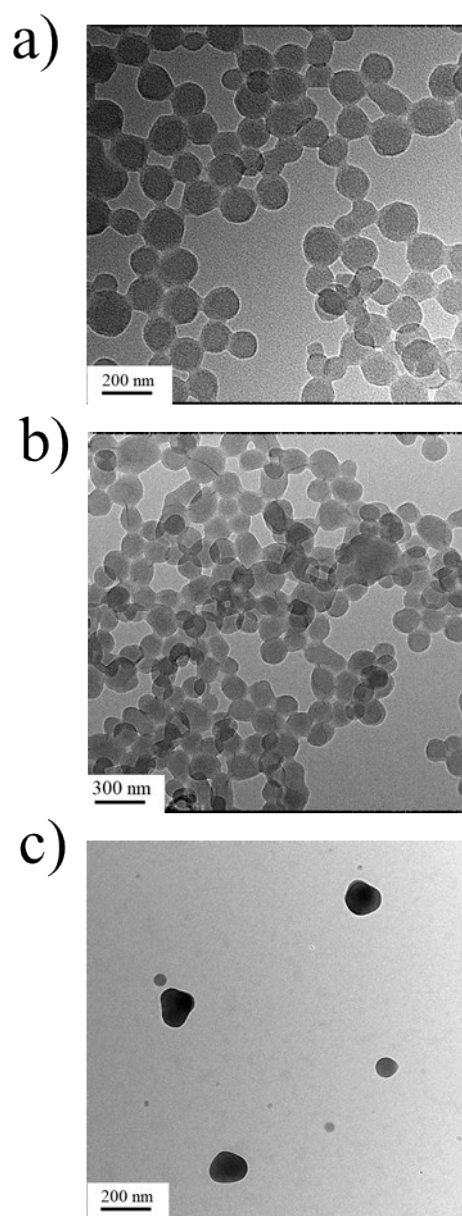

**Figure S5:** (a) TEM image of 40EG<sub>4</sub>-50CL5, scale bar = 200 nm. (b) TEM image of 20EG<sub>4</sub>-50CL3, scale bar = 300 nm. (c) TEM image of 20EG<sub>4</sub>-25CL3\_Rh, scale bar = 200 nm
